# Supplementary material
Source: publisher figshare collection journal article supplement (https://gsapubs.figshare.com/ndownloader/files/28854369)
Supplement: Supplementary file 1 [file 28854369]

## Sheet: 10BM204
Table DR1 - Apatite Fission Track Data Used in HeFTy Modeling
10BM204
Length (μm)	Angle	Length (μm)	Angle	Length (μm)	Angle	Ns	Ni	Zeta	rhoD	Nd	Cl wt%
14.2	46	14.5	69	11	71	11	170	240.6 ± 40	1588530	5000	Not Available
12.9	77	12.6	89	15.4	90	10	183
12.1	81	9.5	81	14.5	75	18	300
14.8	5	12.3	56	16.9	20	8	85
14.5	21	13.1	63	8.1	60	15	164
13.4	62	10.2	44	15.9	75	5	80
13	32	15.8	32	13.5	57	43	528
13.3	67	14.3	61	14.8	45	12	202
13.6	68	13.6	25	15	21	26	268
13.7	44	14.6	31	13.8	45	15	281
11.8	66	14.2	55	15.2	90	26	294
13	68	10.4	63	14.7	77	20	364
13.5	69	12.5	72	13.3	78	22	297
13.3	88	12.2	45	13.5	83	24	346
13	66	14.5	64	14	53	47	621
15.2	18	14.1	51	14.2	76	30	358
13.4	15	13.9	56	9.4	62	19	375
13.4	38	14.2	56	14	10	22	363
12.4	61	15.4	35	13.6	44	16	334
11.7	89	15.4	59	14	32	14	149
15.4	58	12	77	15.1	27
13.5	27
14.4	67
15.4	32
14.5	11
13	67
13.3	79
14.6	54
15.5	60
15.7	15
10.6	67
14.3	20
13.1	0
14.4	59
13.8	27
15	78
13.1	16
14	47
14.8	85
14.9	70
14.1	73
14	78
14.1	56
14.5	48
13.8	77
13	81
15	53
14.2	70
8.7	74
13.6	50
12.4	9
15.3	27
14	72
13.3	78
14.4	41
13.8	39
14	63
14.4	25

## Sheet: 16CH01
Table S2 - Apatite Fission Track Data Used in HeFTy Modeling
16CH01
Length (μm)	Angle	Ns	Ni	Zeta	rhoD	Nd	Cl wt%
9.9	40	13	187	240.6 ± 32	1590230	5000	Not Available
10.3	73	26	487
11.2	54	5	106
7.6	61	5	80
9.6	39	6	129
11.7	35	22	302
9.3	90	5	84
12.5	84	8	93
12.8	72	3	55
9.2	70	6	110
10	53	5	75
11.6	18	11	196
11.5	59	6	87
11.7	48	13	148
12.4	0	18	250
		9	214
		2	50
		14	185
		29	433
		13	231

## Sheet: 16CH02
Table S2 - Apatite Fission Track Data Used in HeFTy Modeling
16CH02
Length (μm)	Angle	Length (μm)	Angle	Length (μm)	Angle	Ns	Ni	Zeta	rhoD	Nd	Cl wt%
13.5	84	14.4	87	14.1	61	30	301	240.6 ± 32	1590060	5000	Not Available
14.4	23	13.8	76	13.4	27	11	188
12.7	59	13.7	67	15.3	42	19	201
13.8	58	12.7	45	14.3	18	20	303
10.2	35	13.1	82	13	57	15	204
11.8	88	12.5	75			5	82
11.8	52	14.2	20			3	52
14.1	79	13.2	55			9	227
12.9	49	12.2	68			7	140
12.3	78	12.4	62			23	246
12.1	62	13.1	67			10	168
12.2	82	11.4	44			11	179
12.7	81	12.7	54			10	164
12.4	46	15.1	68			7	100
14.3	53	12.5	27			19	312
13.2	86	15.3	50			8	111
11.9	89	13	78			13	226
13.6	83	12.5	90			18	358
13.4	34	13	90			21	288
12.3	54	13.6	63			6	102
12	57	14.3	41
16	0	13.7	66

## Sheet: 16PE01
Table S2 - Apatite Fission Track Data Used in HeFTy Modeling
16PE01
Length (μm)	Angle	Ns	Ni	Zeta	rhoD	Nd	Cl wt%
Not detected		7	97	240.6 ± 32	1590450	5000	Not Available
		5	48
		3	25
		1	15
		3	35
		1	10
		3	30

## Sheet: 12CR04
Table S2 - Apatite Fission Track Data Used in HeFTy Modeling
12CR04
Length (μm)	Angle	Length (μm)	Angle	Length (μm)	Angle	Length (μm)	Angle	Ns	Ni	Zeta	rhoD	Nd	Cl wt%
14.5	79	14.1	45	14.6	66	13.3	17	2	81	240.6 ± 32	1606210	5000	Not Available
13.3	13	9.8	62	13.8	82	9.6	77	4	144
15.7	23	15.1	43	10.4	28	14.5	36	5	265
9.2	8	15.1	62	12.1	44	13.1	63	4	90
14.1	9	11.2	30	14.1	83	13.4	36	3	218
13.5	72	9.7	82	14.6	46	10.8	37	5	279
12	79	14.2	15	13.6	88	8.8	56	11	286
13.6	68	8.7	71	12.3	0	12.9	81	3	71
12.2	86	14	48	10.9	51	10.8	64	2	88
14.5	86	14.2	45	11.7	76	15.5	29	1	39
15.3	80	11	68	15.8	0	12.8	62	1	19
13.7	0	8.8	5	14.2	78	15.6	24	2	99
14.5	50	14.2	56	8.4	60	15.9	48	1	119
10	46	14.6	53	12.1	74	9.1	74	4	155
12	77	12.3	29	12	34	15.2	37	5	126
11.2	90	10.2	0	11.8	72	15.6	47	1	87
11.2	78	12.4	77	15.6	42	15.7	77	1	47
10.4	53	12.1	0	10	84	15.4	68	2	85
12.7	74	14	30	13.7	37	9.4	48	6	116
15	29	13.5	61	13.7	43	9.7	82	3	112
11.2	40	13.8	44	16.3	90	14.2	44
12.1	77	12.3	57	10.9	90	12.2	65
7.9	78	13.9	51	13	82	13.5	82
9.6	68	16.7	0	10.4	43	16.5	38
14.2	68	8.3	54	13.9	84	11.8	71

## Sheet: 13COOKES2
Table S2 - Apatite Fission Track Data Used in HeFTy Modeling
13COOKES2
Length (μm)	Angle	Length (μm)	Angle	Length (μm)	Angle	Length (μm)	Angle	Ns	Ni	Zeta	rhoD	Nd	Cl wt%
13	65	14.4	46	15	60	15	90	3	22	221 ± 32	1606210	5000	Not Available
12.6	78	15.2	73	8.8	37	11.6	46	4	31
16.2	58	11.3	52	15	87	13	0	2	29
15.5	49	15.3	5	16.7	47	14	21	3	34
14.8	38	15.7	61	14.2	90			5	69
14.7	57	10.6	51	14	47			5	46
14.2	75	15.4	78	15.6	38			7	75
12.7	45	14.5	49	15.8	86			3	40
15.2	43	11.7	54	12.9	86			3	30
8.6	0	13.7	73	15.4	77			5	60
11.3	50	12.6	69	15	84			5	31
14.4	83	11.3	49	14.7	54			4	38
15.3	82	14	29	14.6	83			4	50
12.3	52	13	55	14.6	34			1	17
13.8	90	13.9	35	13.5	60			6	45
14.1	88	12.1	56	15.2	61			8	86
9.3	47	13.6	53	13.8	0			2	16
14.1	23	13.6	65	13	61			3	29
15.1	48	15.5	70	14.9	32			1	19
14.9	54	13.8	76	14.7	16			6	55
6.2	51	9.2	53	11.6	70
17	8	14.1	62	13.1	90
15.2	62	14.9	64	14.5	52
15.6	49	13.5	83	14.7	81
14.4	32	11.8	58	14.4	18

## Sheet: 06CM01
Table S2 - Apatite Fission Track Data Used in HeFTy Modeling
06CM01
Length (μm)	Angle	Ns	Ni	Zeta	rhoD	Nd	Cl wt%
13.8	40	4	75	221 ± 32	1205230	5000	Not Available
13.7	90	5	87
14.5	89	2	65
12.2	67	3	57
15.5	27	5	69
15	79	7	72
14.1	70	9	125
12.9	47	1	32
16.4	17	2	45
14.5	87	5	89
13.8	27	7	118
9	35	5	70
14.6	46	10	133
12.4	50	6	105
15.4	16	4	51
15.1	17	7	109
13.3	28	7	86
13	0	6	82
13.1	78	4	47
14.3	65	6	101
15.2	37

## Sheet: 06CM02
Table S2 - Apatite Fission Track Data Used in HeFTy Modeling
06CM02
Length (μm)	Angle	Ns	Ni	Zeta	rhoD	Nd	Cl wt%
Not detected		1	14	221 ± 32	1203800	5000	Not Available
		1	12
		0	11
		3	43
		0	5
		1	18
		0	7
		0	7
		3	29
		0	17
		0	8
		1	14
		1	11
		0	7
		0	8
		2	16
		0	16
		1	13
		0	5
		1	13

## Sheet: 06CM03
Table S2 - Apatite Fission Track Data Used in HeFTy Modeling
06CM03
Length (μm)	Angle	Ns	Ni	Zeta	rhoD	Nd	Cl wt%
13.6	69	1	74	240.6 ± 32	1608730	5000	Not Available
14.9	48	0	26
13.5	85	1	28
15	90	0	25
16.1	52	3	129
14.2	40	2	48
13.5	55	2	52
15.4	25	4	111
14	90	0	9
12.7	43	2	31
15.2	12	0	44
13.2	23	0	23
14.7	90	1	18
13.9	90	3	123
19.5	90	2	60
13.4	29	0	11
11.9	53	1	13
		1	22
		2	61
		2	73

## Sheet: 13MS06
Table S2 - Apatite Fission Track Data Used in HeFTy Modeling
13MS06
Length (μm)	Angle	Length (μm)	Angle	Ns	Ni	Zeta	rhoD	Nd	Cl wt%
13.4	68	12.2	78	2	63	240.6 ± 32	1212370	5000	Not Available
13.9	28	16.3	31	4	93
15.8	28	6.4	55	18	489
14.2	59	9.7	59	5	112
14.2	67	8.1	34	3	75
10.9	25	14.7	48	2	40
10.2	19	14.5	70	2	66
13.1	72	9	62	5	101
12.8	16			0	2
12	63			8	254
15.1	57			0	24
15.1	79			3	77
13.7	36			5	170
9.6	90			3	40
13.6	33			2	55
10.7	0			2	44
7.7	0			4	75
12.8	89			3	67
14.6	47			2	70
14.5	40			13	325
7	42
14.4	84
14.8	40
13.4	58
12.1	60

[truncated: 16 more sheets: 16FL01, 16FL02, 16FL04, 16FL05, 05BM183, 10BM219, 16EP01, 15FC01, 18FC03, 18FC04, 14SA32, 14SA36, 14SA44, 15SA88, 18SAS44, 18SAS51]
